# Supplementary material
Source: publisher figshare collection journal article supplement (https://tandf.figshare.com/articles/dataset/_/7149173)

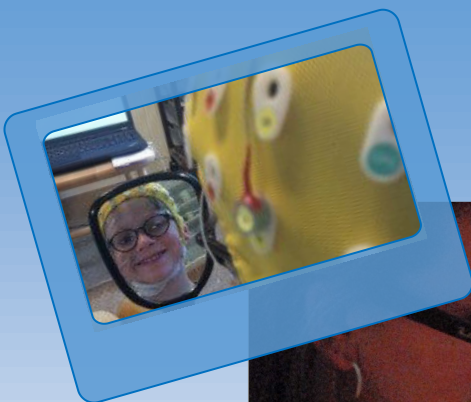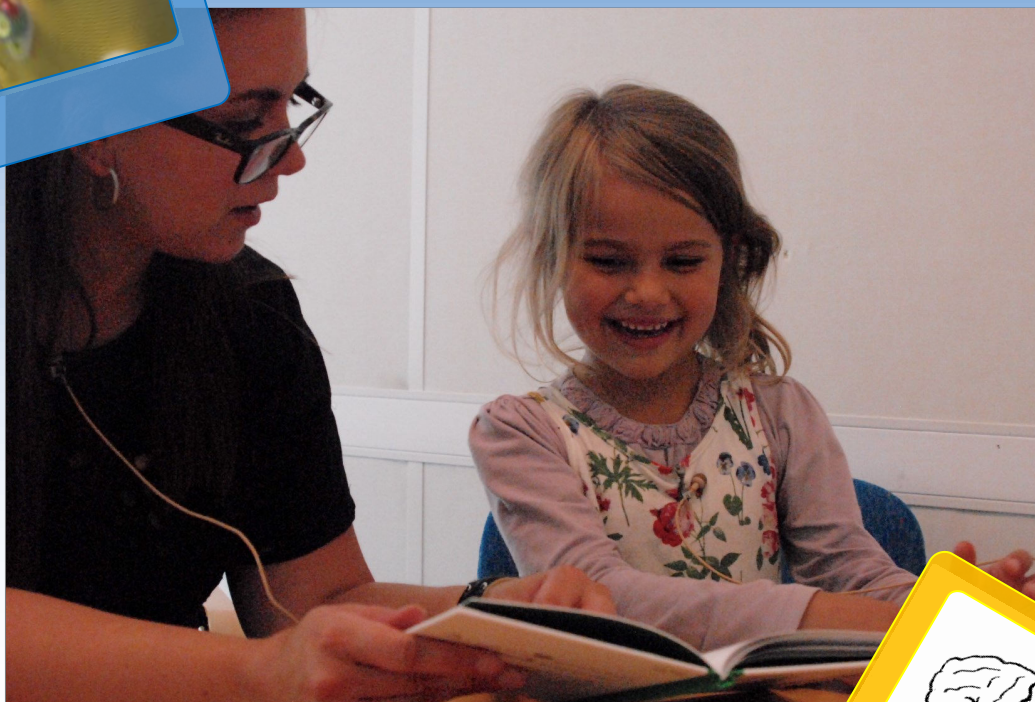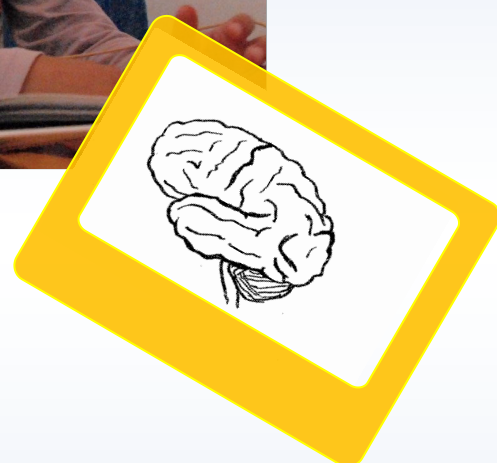

# Hjärnvägar i förskolan – forskning pågår!

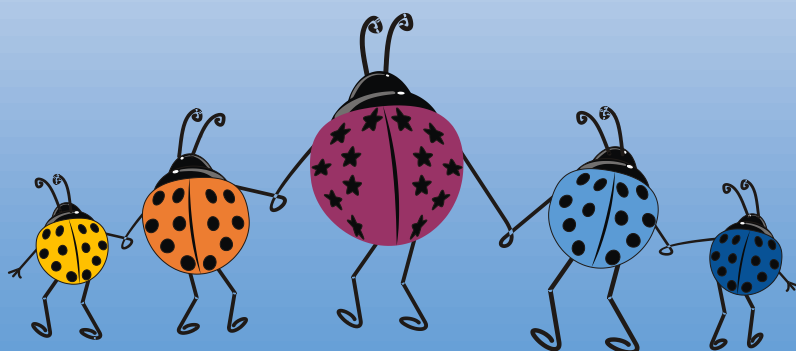

Vad tror du att **forskning** kan vara?

När man forskar, vill man veta mer om hur något fungerar. Man kan forska om nästan vad som helst.

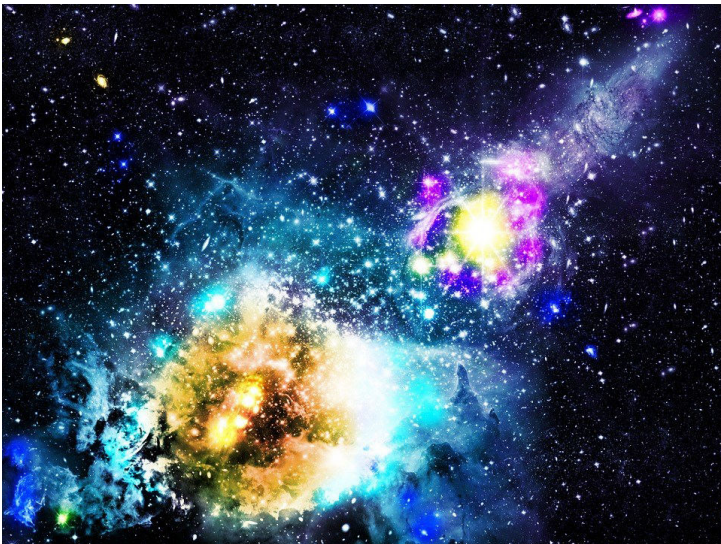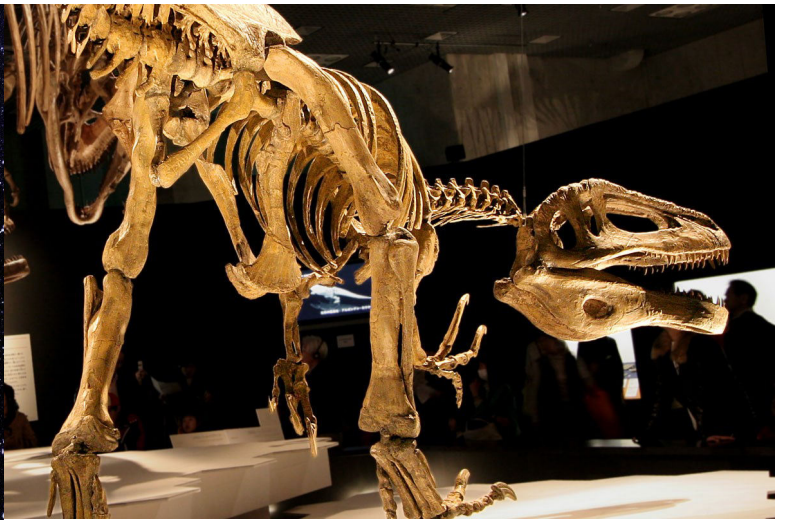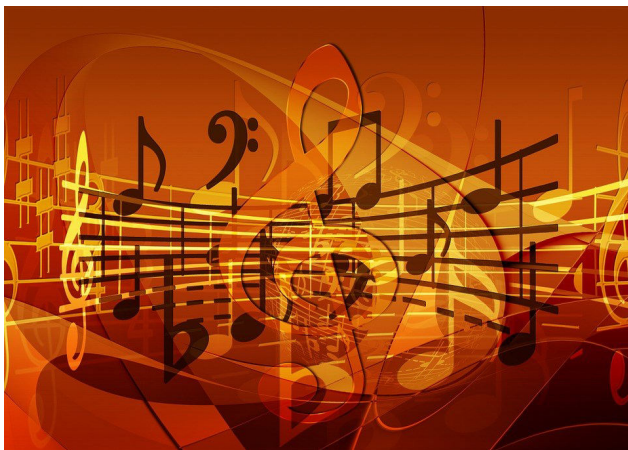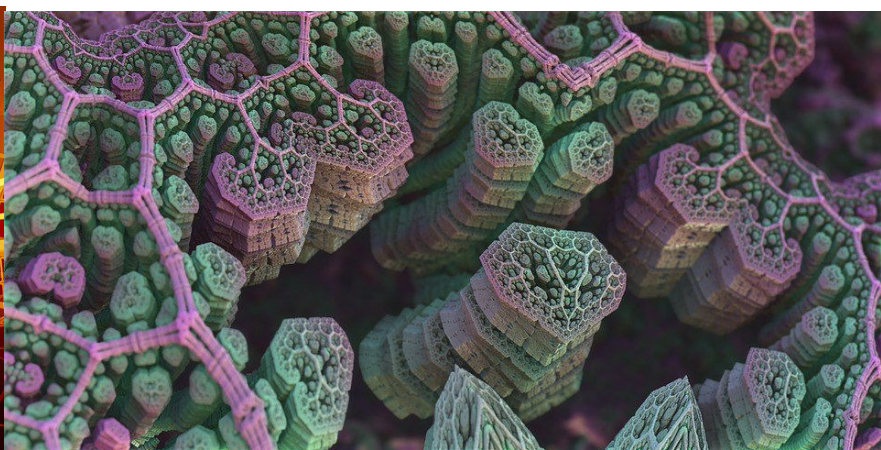



Vi är ett gäng **forskare** som ska komma till din förskola. Vi hoppas att du vill vara med och hjälpa oss med vår forskning. Vi är nyfikna på **hur barn lär sig** nya saker i förskolan.

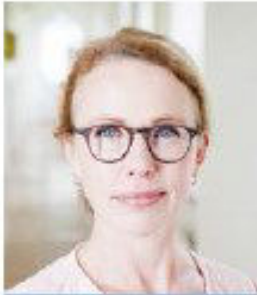

Sofia Frankenberg

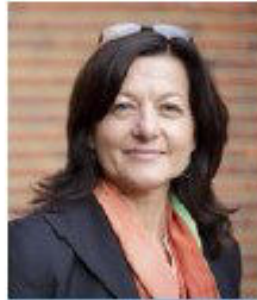

Hillevi Lenz Taguchi

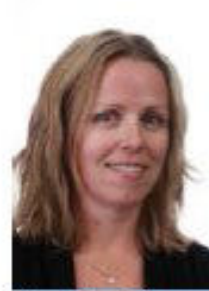

Tove Gerholm

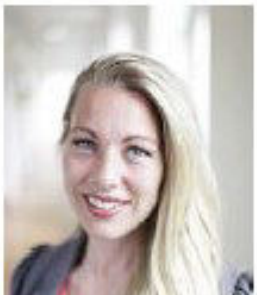

Susanne Kjällander

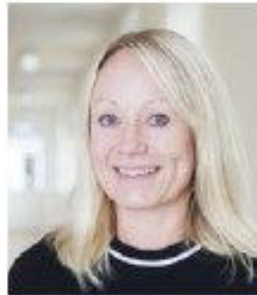

Anna Palmer

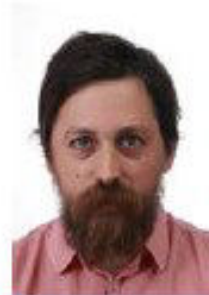

Petter Kallioinen

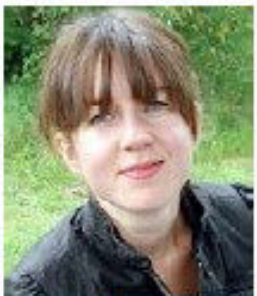

Linnea Bodén

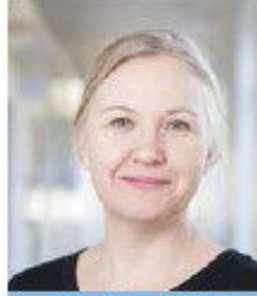

Teresa Elkin Postila

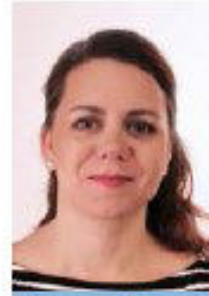

Signe Tonér

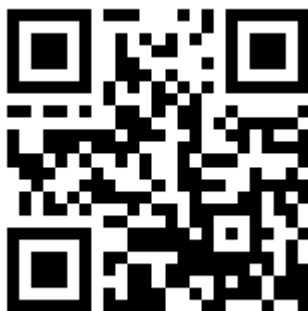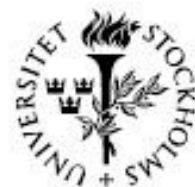

Stockholms  
universitet

Forskarna är på förskolan nästan hela dagen, kanske nästan i en hel vecka. Kanske äter de lunch vid ditt bord eller sitter bredvid dig på samlingen?

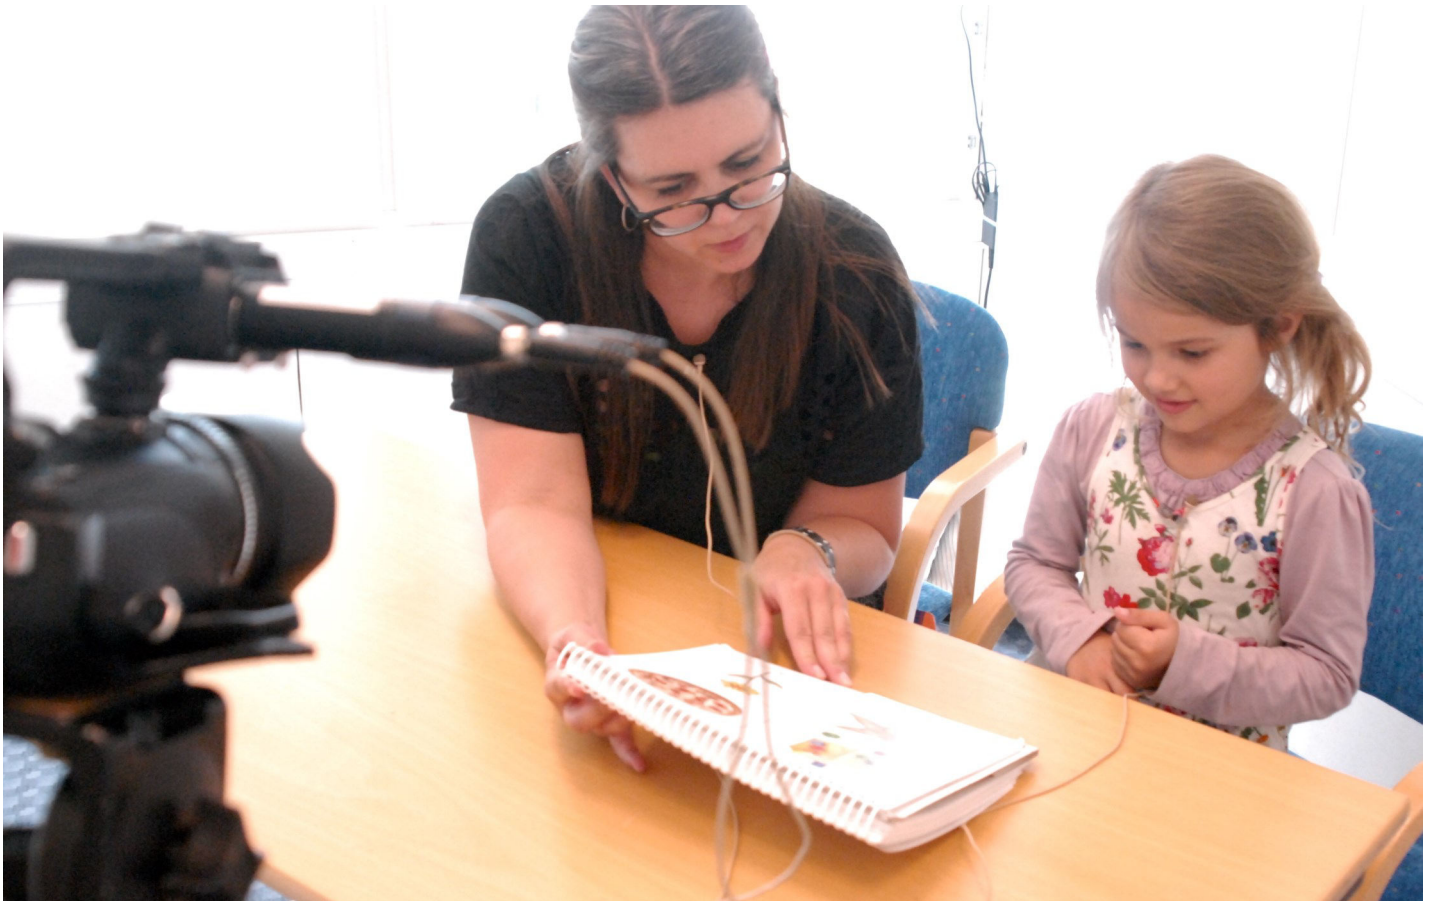

Vi forskare vill gärna jobba tillsammans med varje barn på förskolan. Du bestämmer själv om du vill vara med.

Ett barn i taget får jobba tillsammans med en forskare.

När vi jobbar, sitter vi vid ett bord i ett lugnt rum. Både barnet och forskaren har små **mikrofoner**, som man sätter fast i tröjan.

En **kamera** filmar det vi gör.

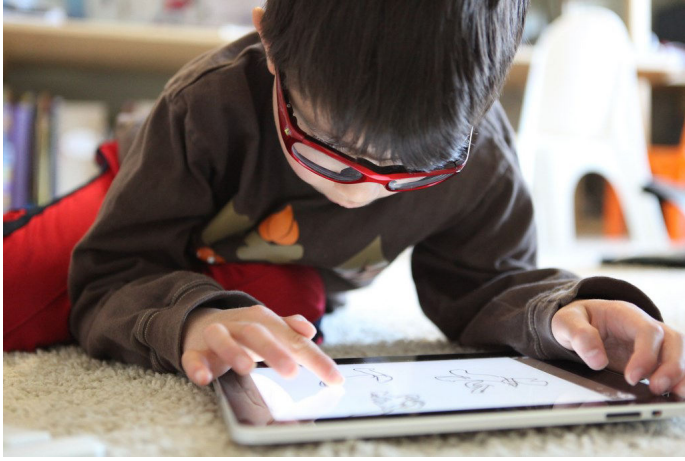

Lätt som en plätt eller  
kanske lite klurigt  
ibland?

Forskaren kommer att hjälpa dig och förklara hur du ska göra.

Du kommer att få **lyssna, berätta, jobba med siffror, titta på bilder, jobba med kroppen och spela på iPad.**

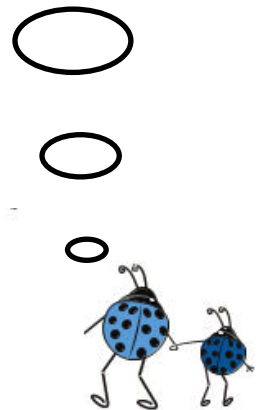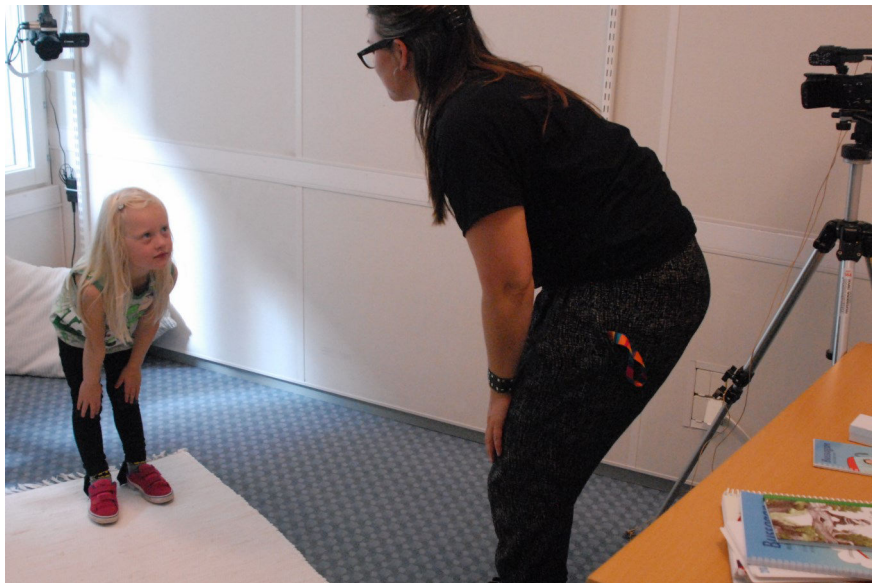

Alla de där olika uppgifterna hjälper oss att förstå hur barn lär sig saker.



Många brukar tycka att det är intressant och roligt att hjälpa till med forskning. Det är något ovanligt som inte så många har provat.

Om du känner dig lite trött kan du få vila en stund eller komma tillbaka senare.

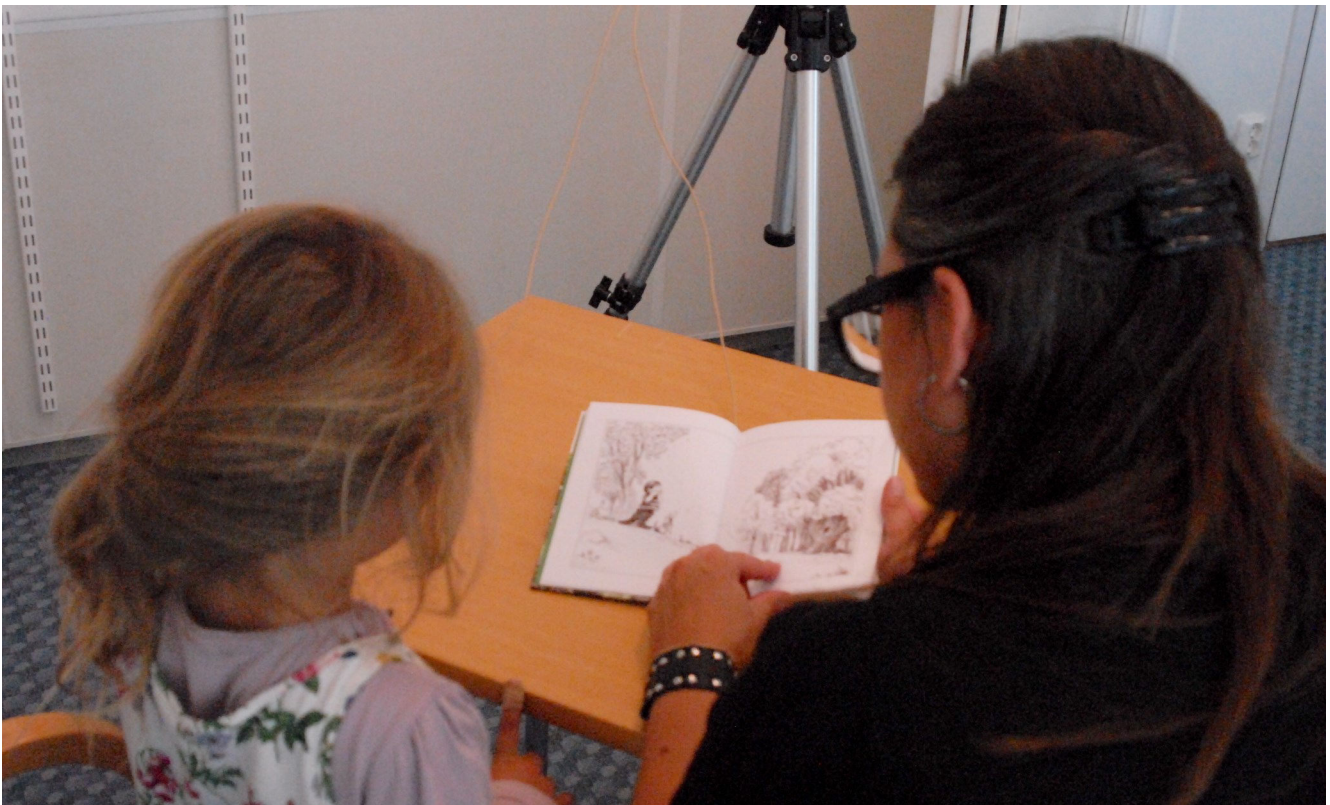

Efter några veckor kommer forskarna tillbaka och så jobbar vi tillsammans och gör nästan precis samma saker **en gång till**.

Det är viktigt att göra färdigt, för då kan vi se vad du har lärt dig!

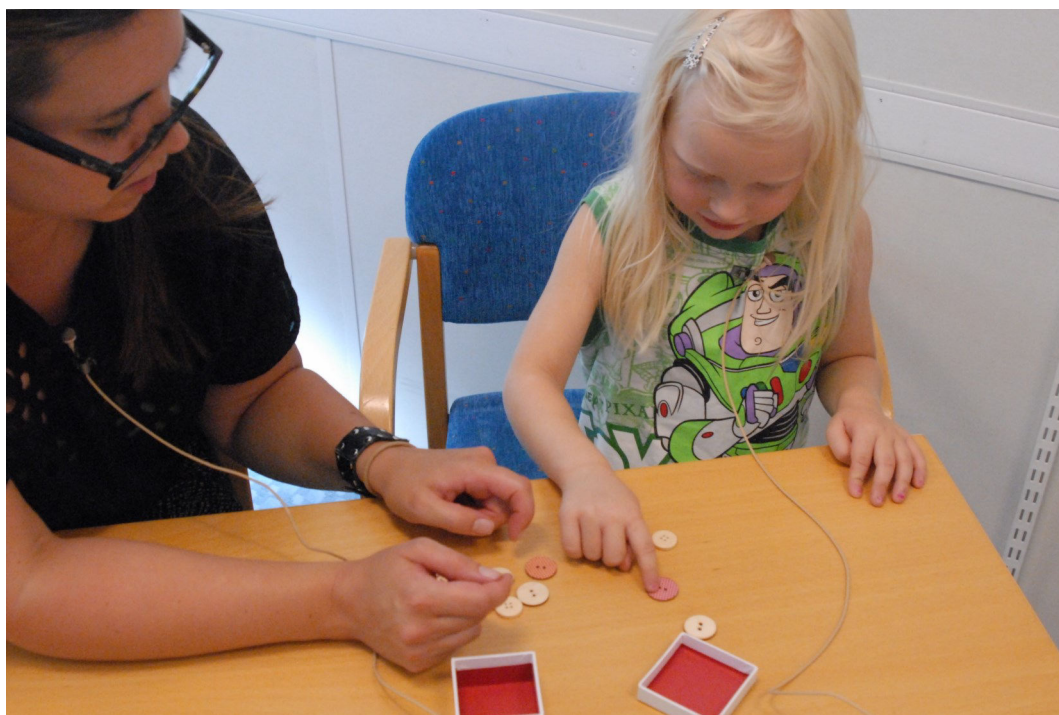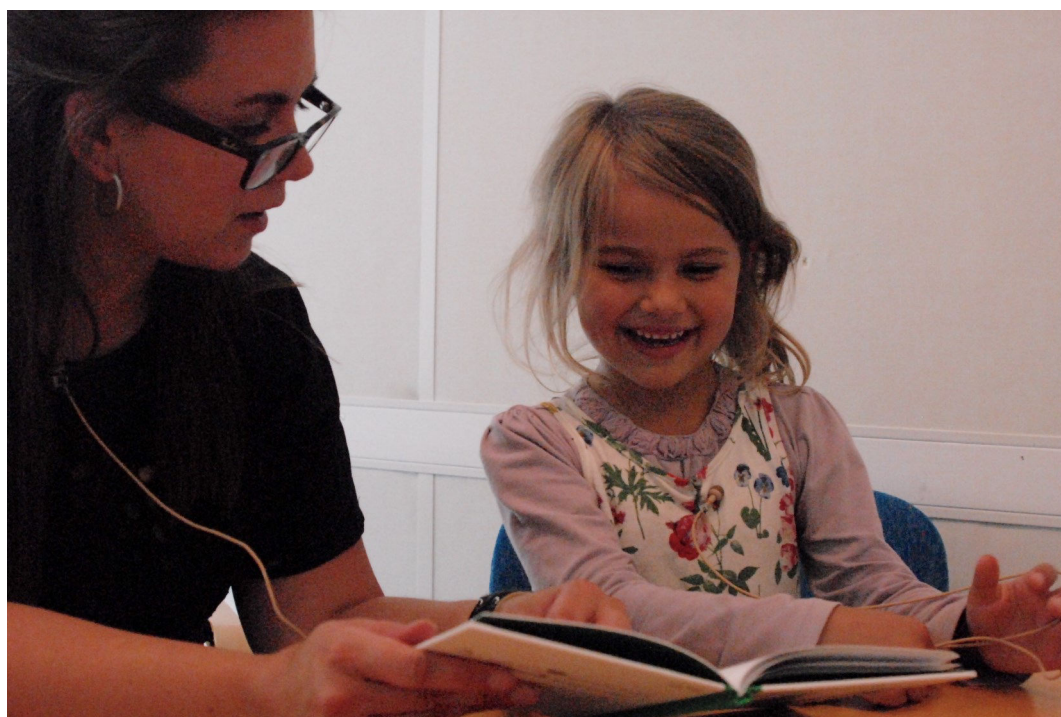

Några av forskarna är superintresserade av  
hur **uppmärksamhet** fungerar.

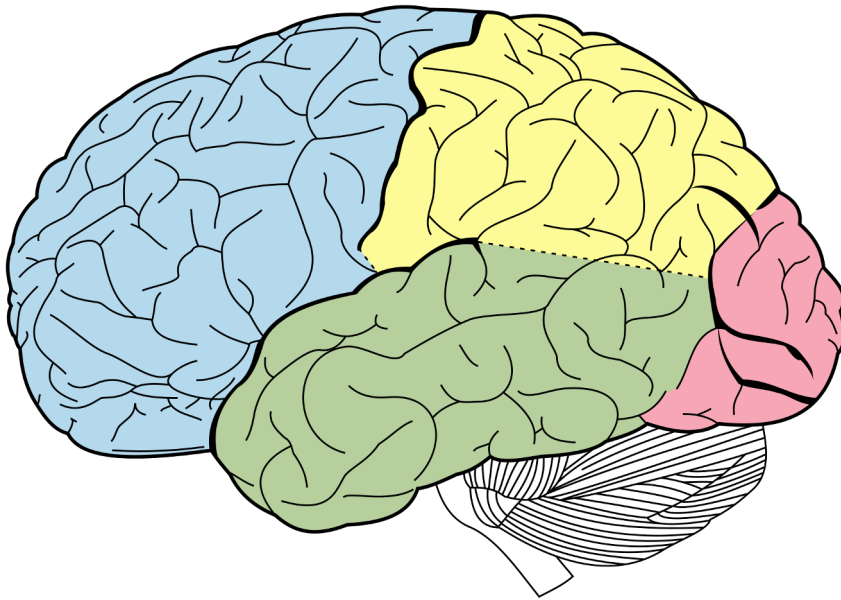

**Hjärnan** håller reda på allt som händer.

Det man ser och hör...

kroppens rörelser, tankar, känslor ...

och allt man lär sig!

Det är mycket att hålla reda på, men hjärnan är **verkligen bra** på att  
hålla reda på saker.

**Uppmärksamhet** hjälper oss att bara göra det som är viktigt och att  
inte tänka på sånt som stör. Man kan faktiskt mäta uppmärksamhet i  
hjärnan genom att fånga upp **hjärnvågorna**.

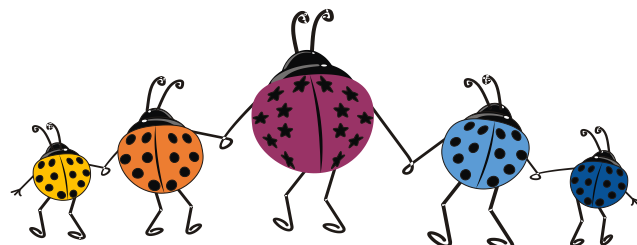



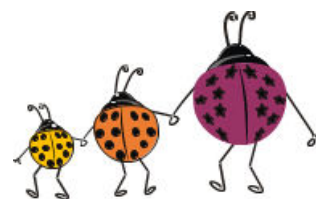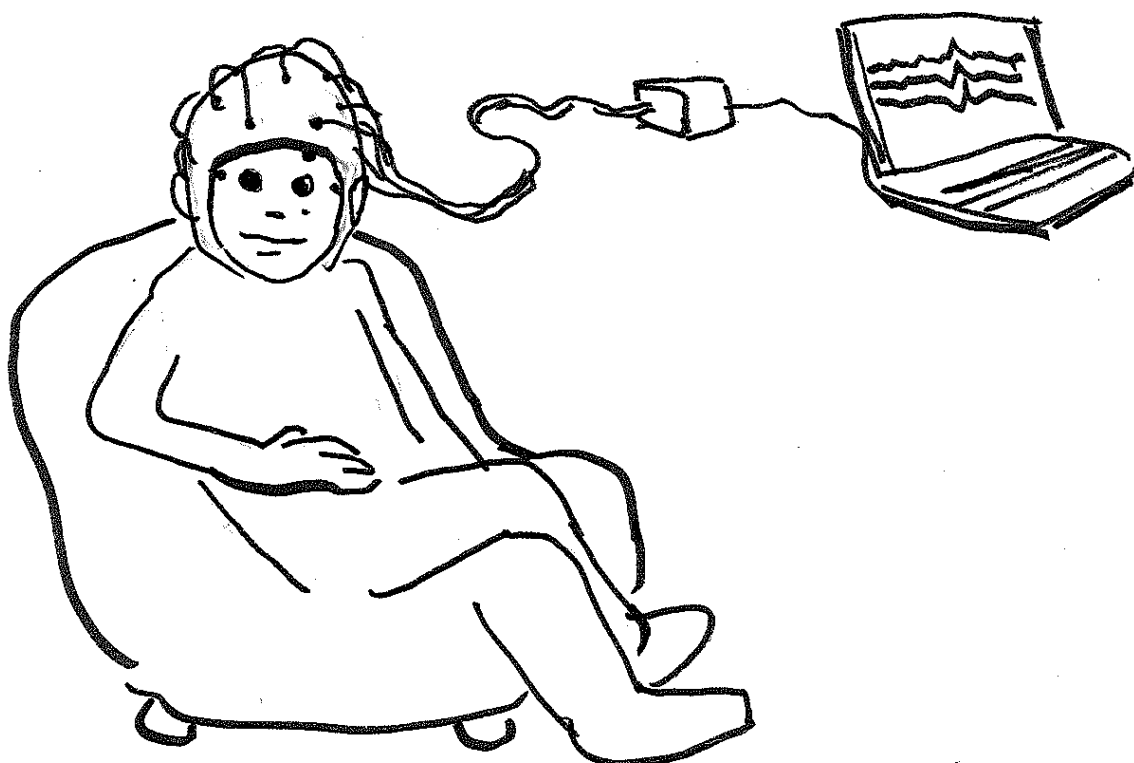

Vi har dragit lott om vilka barn som kommer att vara med i vårt **hjärnvågsexperiment**. Men man måste inte vara med om man inte vill.

Alla barn som är nyfikna på att se vår utrustning, få komma in och titta! Men när det är experimentdags, kan bara ett barn vara inne i rummet.

När vi gör hjärnvågsexperimentet är det bra att ha en **lugn kropp**. Du får ha en **speciell mössa** med knappar, som kan fånga upp hjärnvågorna.

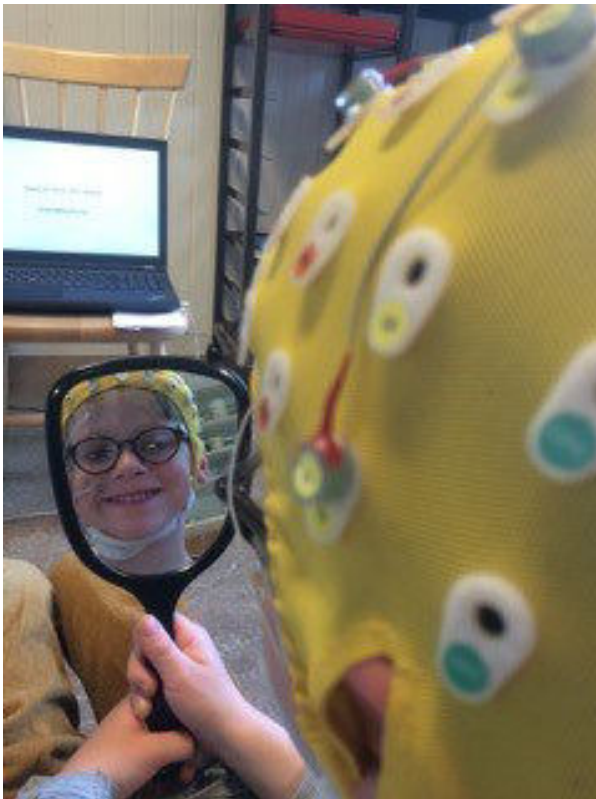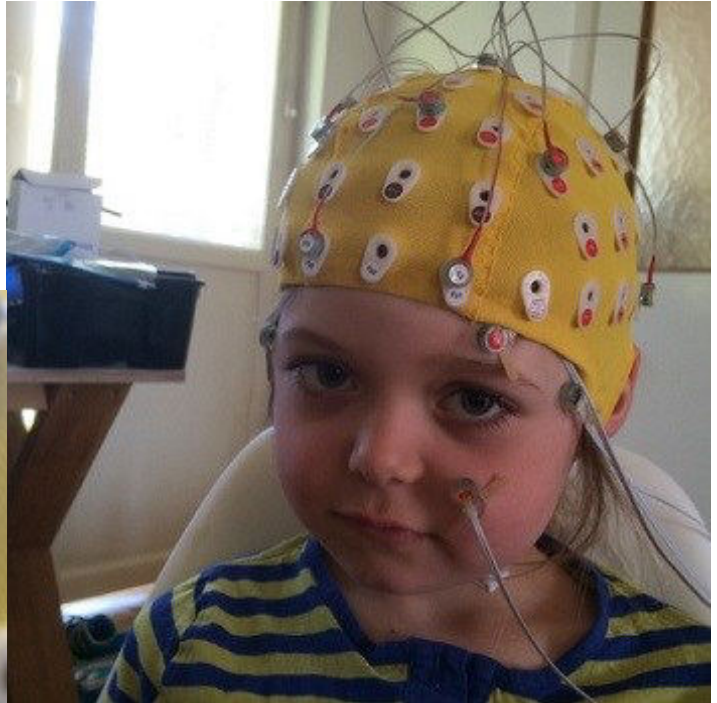

För att det ska funka bra behöver vi sätta lite **gelé** i håret. Det känns lite lustigt, nästan kallt.

Alla sladdar från mössan kopplas in i en **speciell apparat** som sitter ihop med en dator. Väldigt annorlunda!



Sen är det dags att lyssna noga.  
Du får höra **två sagor samtidigt!**

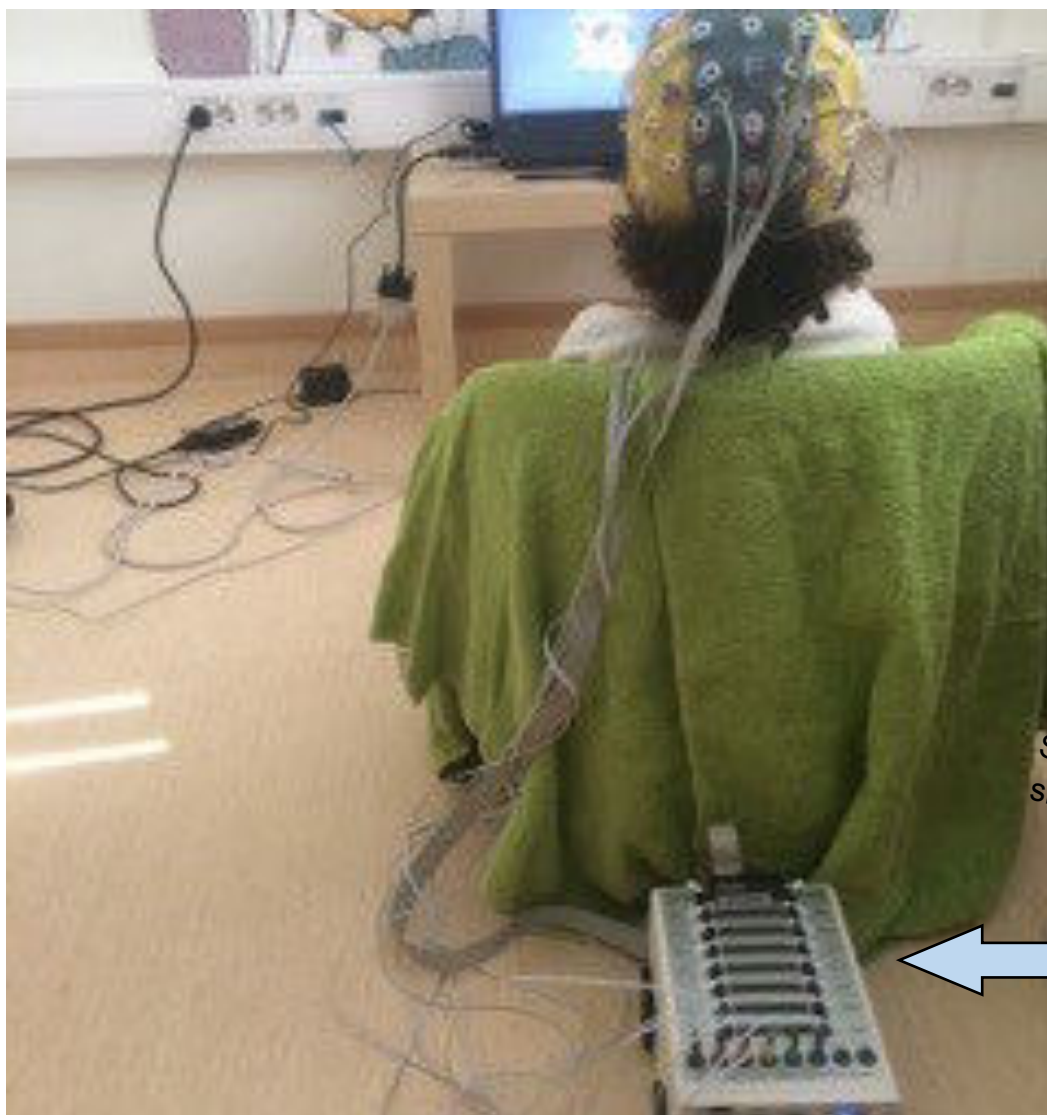

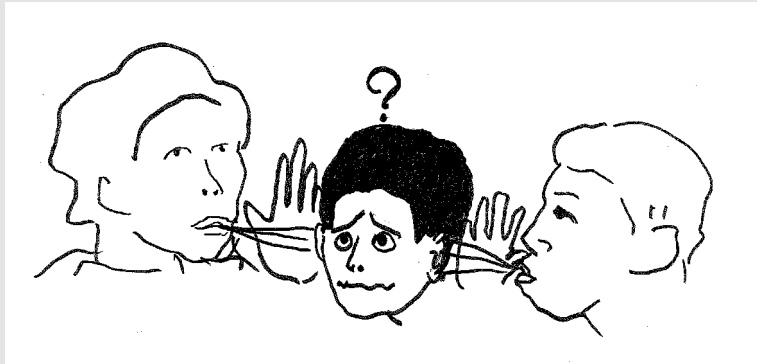

Kanske känns det lite snurrt, men din hjärna hjälper dig att bara lyssna på den ena sagan och strunta i den andra.

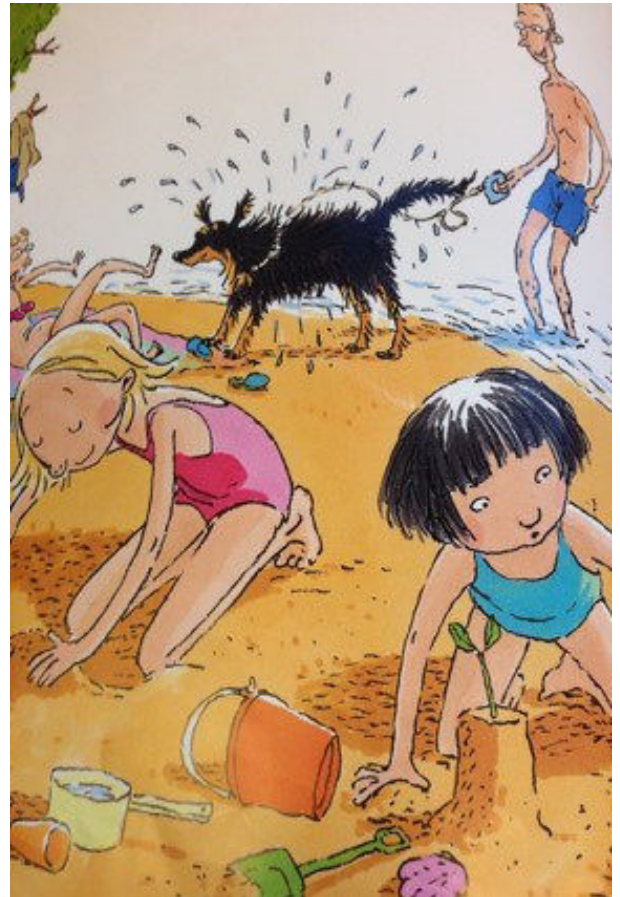

Bilder på datorn hjälper också till!

När sagorna är slut, tar vi av mössan.

Om du vill, får du titta på dina hjärnvågor på en dator.

Efter några veckor kommer vi tillbaka och mäter hjärnvågorna igen, för att se om de har blivit starkare.

Det är viktigt att göra färdigt, för då kan vi se vad du har lärt dig!



Forskarna tycker det är jättekul att forska tillsammans med barn och pedagoger. Vi hjälps åt för att förstå hur man lär sig nya saker!

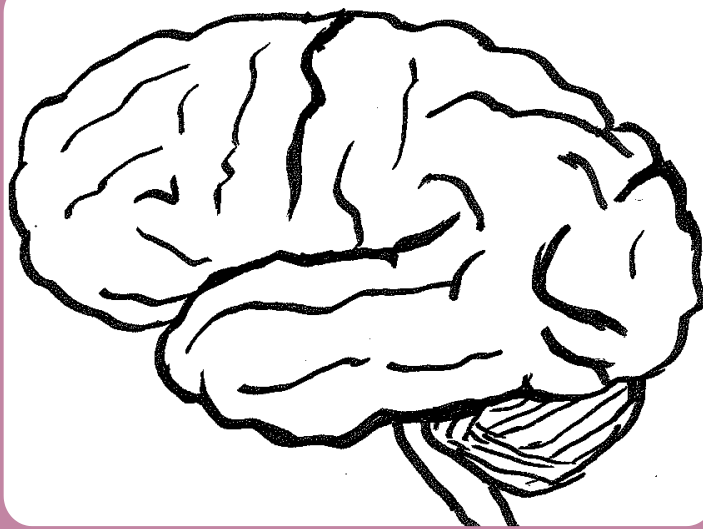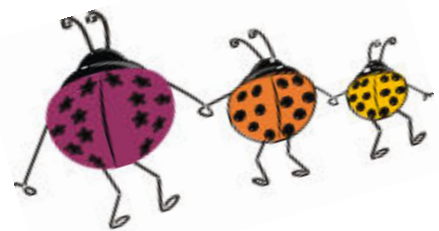

**Vill du fråga forskarna om  
något?**

**Räkna alla  
nyckelpigor!**

**Har du lärt dig något  
nytt om att forska?  
Vad då?**

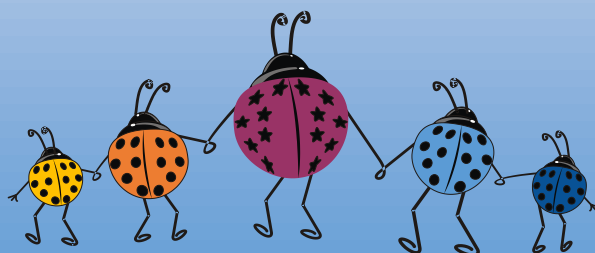

Supplement: Supplementary file 1 [file 2]
