# Supplementary material
Source: publisher figshare collection journal article supplement (https://tandf.figshare.com/articles/dataset/_/7149173)
Supplement: Supplementary file 2 [file 2]

# Forskning pågår: LÖNNEBERGA



SEMLA



DIL



Kontroll



# Forskning pågår

## Pretest, vecka 1

**Barn: vanlig verksamhet**

**Pedagoger: vanlig verksamhet, SEMLA-utbildning**

**Forskare:**

**Testare**

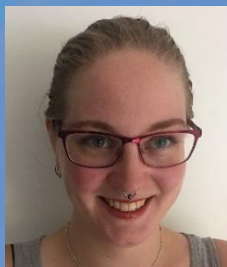

**Sofia**

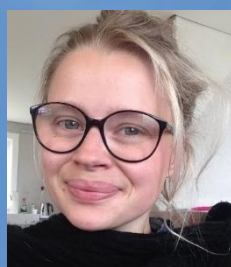

**Mikaela**

**Testare med mössan**

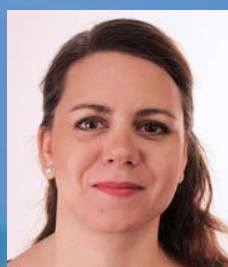

**Signe**

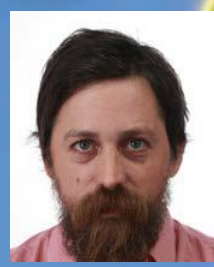

**Petter**

**Barnets perspektiv**

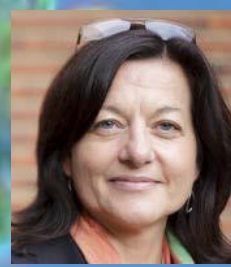

**Hillevi**

**SEMLA**

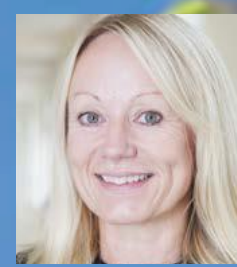

**Anna**

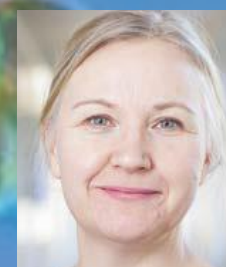

**Teresa**

# Forskning pågår

## Pretest, vecka 2

Barn: vanlig verksamhet

Pedagoger: vanlig verksamhet, SEMLA-utbildning

**Forskare:**

**Testare**



**Sofia**



**Mikaela**

**Testare med mössan**



**Signe**



**Petter**

**Barnets perspektiv**



**Hillevi**

**SEMLA**

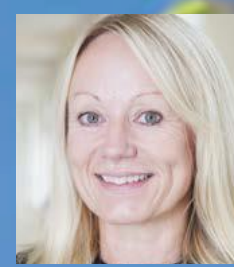

**Anna**

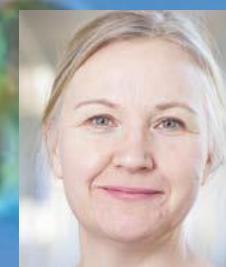

**Teresa**



# Forskning pågår

## Vecka 3

**Barn: SEMLA**

**Pedagoger: SEMLA, pedagogisk dokumentation**

**Forskare:**

**Korta videoklipp**

**Barnets perspektiv**

**SEMLA**

**Långa videoklipp**

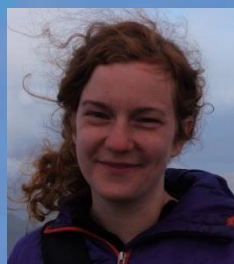

**Matilda**

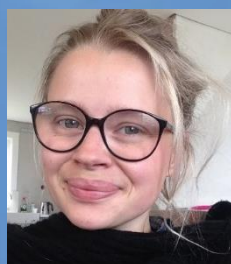

**Mikaela**

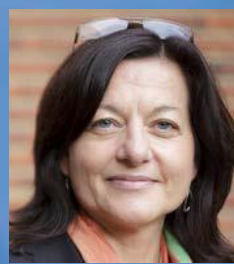

**Hillevi**

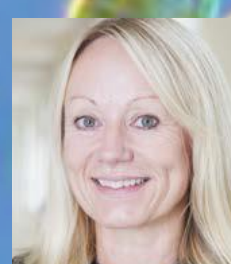

**Anna**

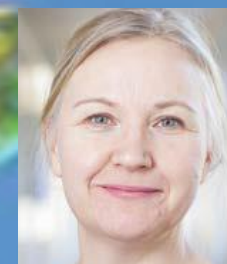

**Teresa**

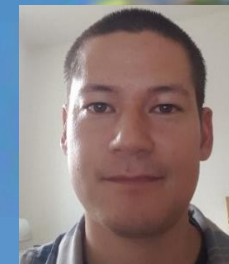

**John**

# Forskning pågår

## Vecka 4

**Barn: SEMLA**

**Pedagoger: SEMLA, pedagogisk dokumentation**

**Forskare:**

**Korta videoklipp**

**SEMLA**

**Långa videoklipp**

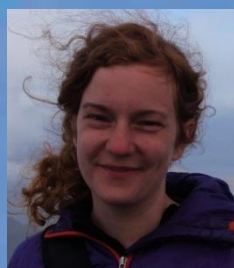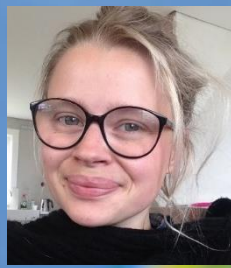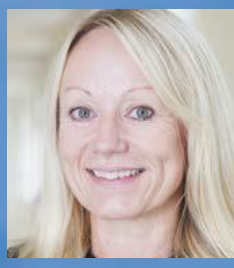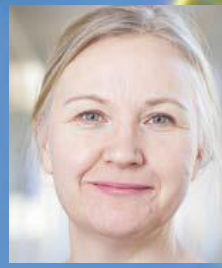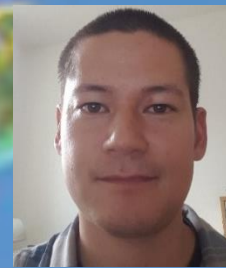

**Matilda Mikaela**

**Anna Teresa**

**John**



# Forskning pågår

## Vecka 5

**Barn: SEMLA**

**Pedagoger: SEMLA, pedagogisk dokumentation**

**Forskare:**

**Korta videoklipp**

**SEMLA**

**Långa videoklipp**



**Matilda**

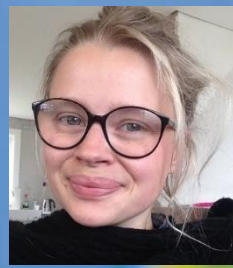

**Mikaela**



**Anna**

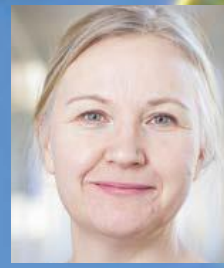

**Teresa**

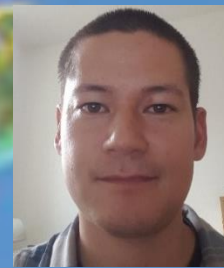

**John**

# Forskning pågår

## Vecka 6

**Barn: SEMLA**

**Pedagoger: SEMLA, pedagogisk dokumentation**

**Forskare:**

**Korta videoklipp**

**SEMLA**

**Långa videoklipp**

**ECERS**



**Matilda**



**Mikaela**

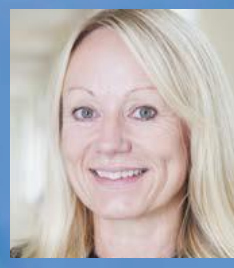

**Anna**

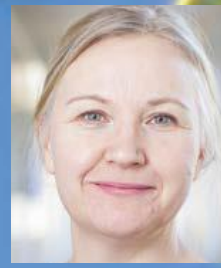

**Teresa**

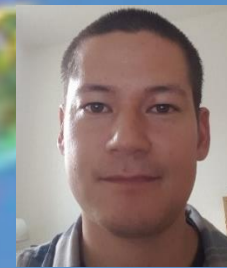

**John**

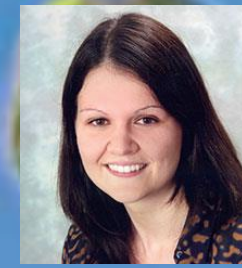

**Susanne**



# Forskning pågår

## Vecka 7

**Barn: SEMLA**

**Pedagoger: SEMLA, pedagogisk dokumentation**

**Forskare:**

**Korta videoklipp**

**SEMLA**

**Långa videoklipp**



**Matilda**



**Mikaela**



**Anna**



**Teresa**



**John**



# Forskning pågår

## Vecka 8

**Barn: SEMLA**

**Pedagoger: SEMLA, pedagogisk dokumentation**

**Forskare:**

**Korta videoklipp**

**SEMLA**

**Långa videoklipp**



**Matilda**

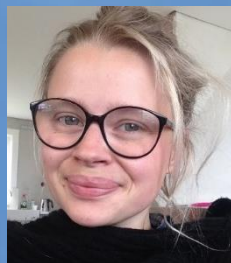

**Mikaela**

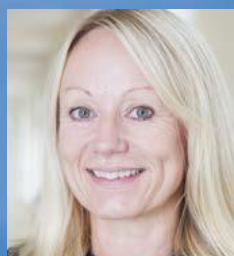

**Anna**

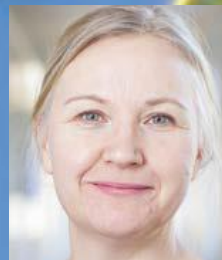

**Teresa**

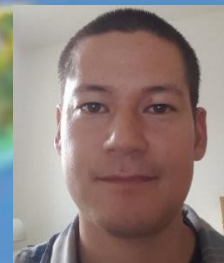

**John**

# Forskning pågår

## Posttest, vecka 9

Barn: vanlig verksamhet

Pedagoger: vanlig verksamhet

Forskare:

Testare



Sofia



Mikaela

Testare med mössan

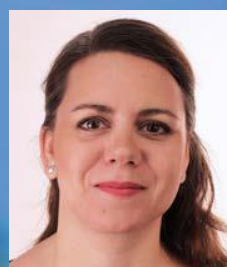

Signe

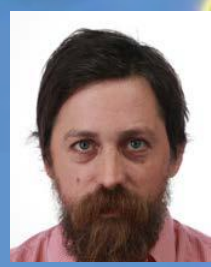

Petter

Barnets perspektiv



Hillevi



# Forskning pågår

## Posttest, vecka 10

**Barn: vanlig verksamhet**

**Pedagoger: vanlig verksamhet**

**Forskare:**

**Testare**

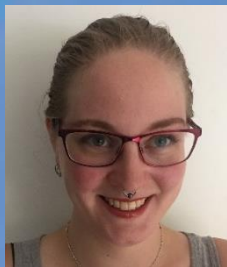

**Sofia**

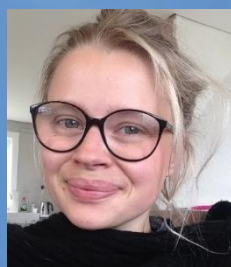

**Mikaela**

**Testare med mössan**

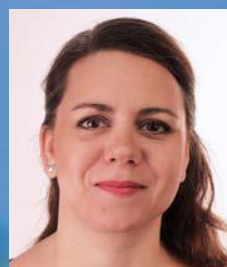

**Signe**

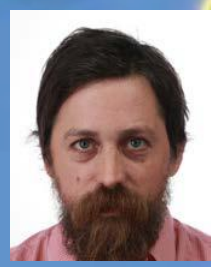

**Petter**

**Barnets perspektiv**

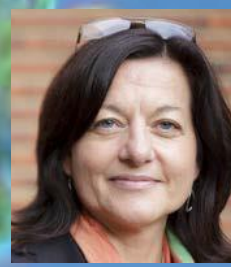

**Hillevi**

# Hjärnvägar i förskolan - Forskning pågår

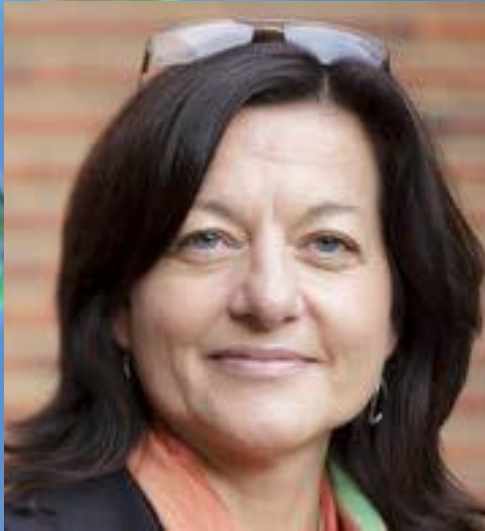

**Kontaktperson:**  
**Hillevi Lenz**  
**Taguchi**  
[hillevi@buv.su.se](mailto:hillevi@buv.su.se)  
**08-12 07 63 82**

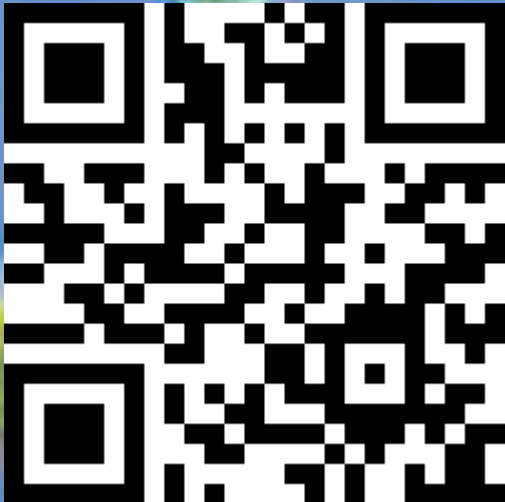

Hemsida: [www.buv.su.se/hjarnvaegar](http://www.buv.su.se/hjarnvaegar)

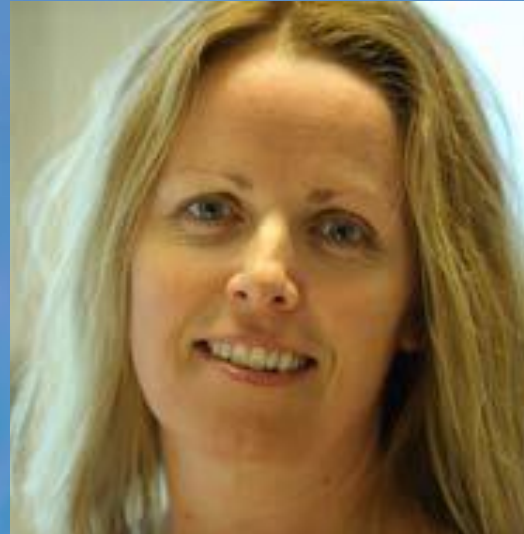

**Kontaktperson:**  
**Tove Gerholm**  
[tove@ling.su.se](mailto:tove@ling.su.se)  
**08-16 23 35**

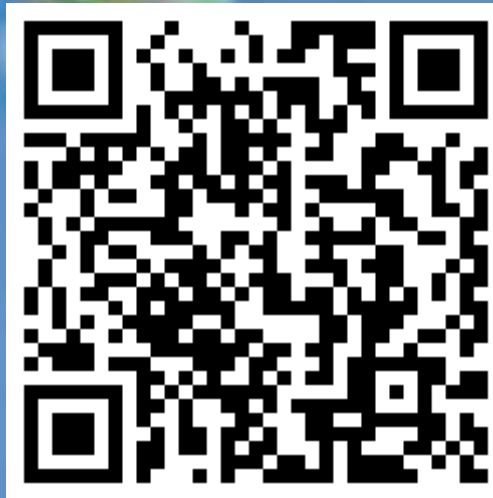

Projektbeskrivning



| v. 40<br>pretest                         | v. 41<br>pretest                         | v. 42<br>interven-<br>tion                  | v. 43                                       | v. 44                                       | v. 45                                       | v.46                                             | v. 47                                            | v. 48                             | v. 49                              |
|------------------------------------------|------------------------------------------|---------------------------------------------|---------------------------------------------|---------------------------------------------|---------------------------------------------|--------------------------------------------------|--------------------------------------------------|-----------------------------------|------------------------------------|
| Tester:<br>Sofia+<br>Mikaela             | Tester:<br>Sofia+<br>Mikaela             | Korta<br>videoklipp:<br>Matilda+<br>Mikaela | Korta<br>videoklipp:<br>Matilda+<br>Mikaela | Korta<br>videoklipp:<br>Matilda+<br>Mikaela | Korta<br>videoklipp:<br>Matilda+<br>Mikaela | Korta<br>video-<br>klipp:<br>Matilda+<br>Mikaela | Korta<br>video-<br>klipp:<br>Matilda+<br>Mikaela | Tester:<br>Sofia+<br>Mikaela      | Tester:<br>Sofia+<br>Mikaela       |
| EEG:<br>Signe+<br>Petter                 | EEG:<br>Signe+<br>Petter                 | SEMLA:<br>Anna+<br>Teresa                   | SEMLA:<br>Anna+Teresa                       | SEMLA:<br>Anna+<br>Teresa                   | SEMLA:<br>Anna+<br>Teresa                   | SEMLA:<br>Anna+<br>Teresa                        | SEMLA:<br>Anna+<br>Teresa                        | EEG:<br>Signe+<br>Petter          | EEG:<br>Signe+<br>Petter           |
| Barnets<br>perspektiv:<br>Hillevi        | Barnets<br>perspektiv:<br>Hillevi        | Barnets<br>perspektiv:<br>Hillevi           | Långa video-<br>klipp: JOHN                 | Långa<br>videoklipp:<br>JOHN                | Ecers-<br>utvärdering<br>(8/11):<br>Susanne | Långa<br>video-<br>klipp:<br>JOHN                | Långa<br>video-<br>klipp:<br>JOHN                | Barnets<br>perspektiv:<br>Hillevi | Barnets<br>perspektiv:<br>Hillevi  |
| SEMLA-<br>utbildning:<br>Anna+<br>Teresa | SEMLA-<br>utbildning:<br>Anna+<br>Teresa | Långa<br>videoklipp:<br>JOHN                |                                             |                                             | Långa<br>videoklipp:<br>JOHN                |                                                  |                                                  |                                   | Fokusgrupp<br>I JANUARI:<br>Linnea |

# Hjärnvägar i förskolan - Forskning pågår

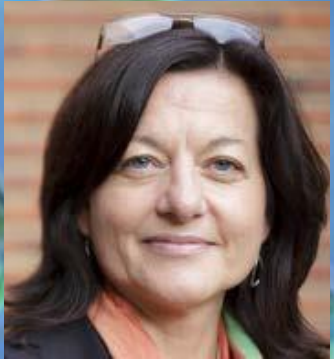

**Hillevi Lenz  
Taguchi**  
Projektledare  
(Pre-, posttest;  
Barnperspektiv,  
Fokusgrupper)

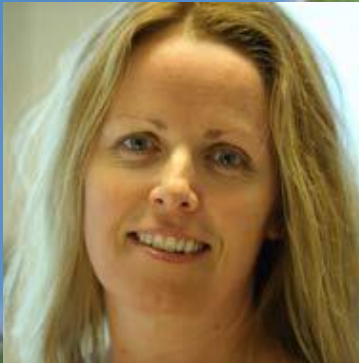

**Tove Gerholm**  
Projektledare  
(Pre-, posttest)

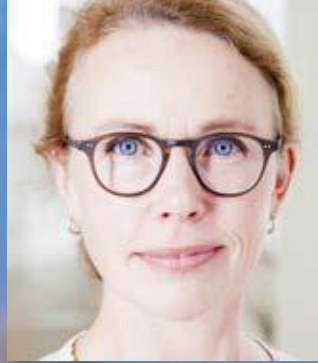

**Sofia  
Frankenberg**  
(DIL; långa  
videoklipp)

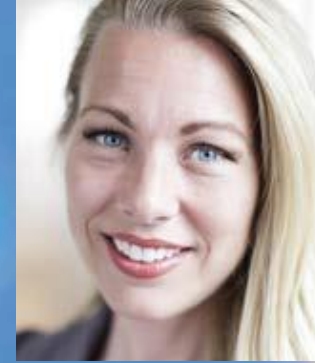

**Susanne  
Kjällander**  
(DIL, långa  
videoklipp)

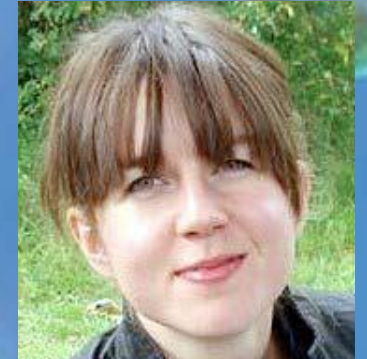

**Linnea Bodén**  
(Pre-, posttest;  
Barnperspektiv,  
Fokusgrupper)

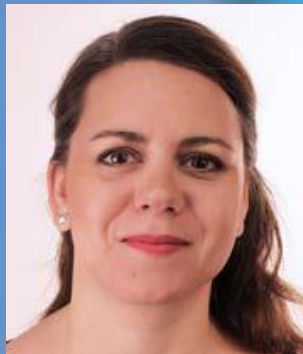

**Signe Tonér**  
(Pre-, posttest:  
EEG)

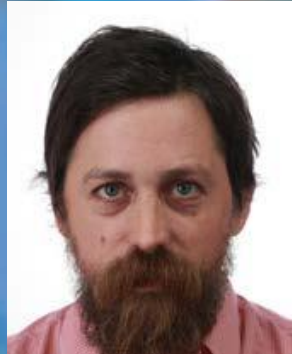

**Petter  
Kallioinen** (Pre-,  
posttest: EEG)

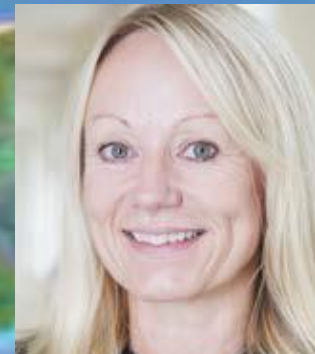

**Anna Palmer**  
(SEMLA)

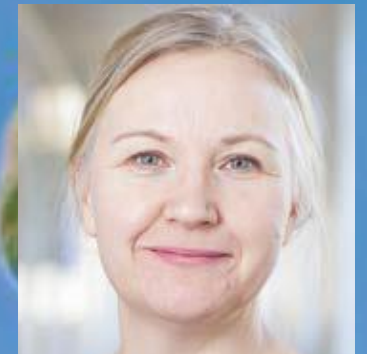

**Teresa Elkin  
Postila**  
(SEMLA)



# Hjärnvägar i förskolan - Forskning pågår

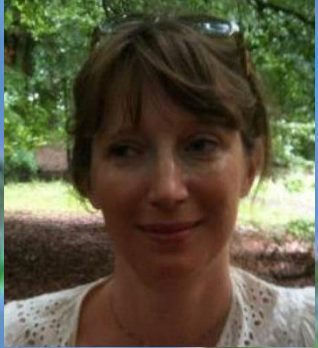

**Linda Kellen-Nilsson**  
(Pre-, posttest;  
korta videoklipp;  
DIL)

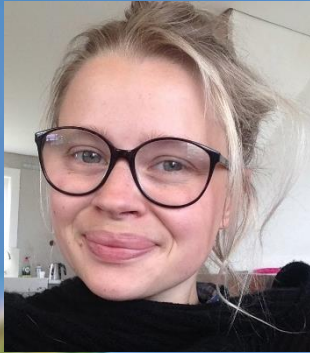

**Mikaela Broberg**  
(Pre-, posttest;  
korta  
videoklipp)

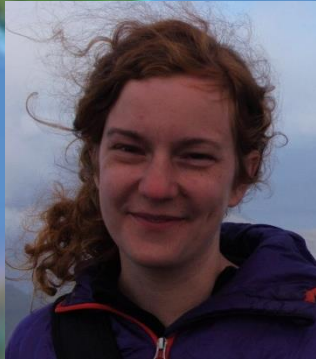

**Matilda Löfstrand**  
(Pre-, posttest;  
korta videoklipp;  
DIL)

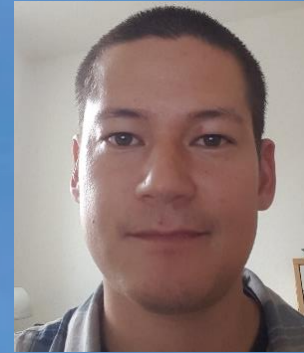

**John Kaneko**  
(Pre-, posttest;  
långa  
videoklipp)

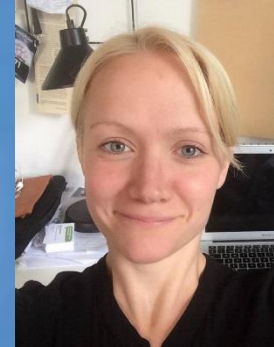

**Paulina Gunnardo**  
(Pre-, posttest;  
korta  
videoklipp)

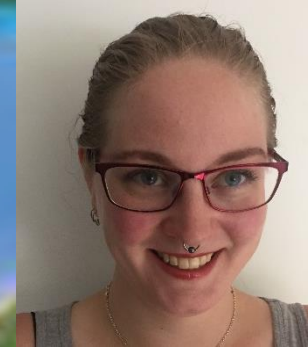

**Sofia Due**  
(Pre-, posttest;  
korta  
videoklipp)

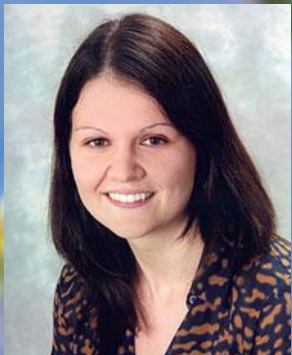

**Susanne Garvis**  
(ECERS)

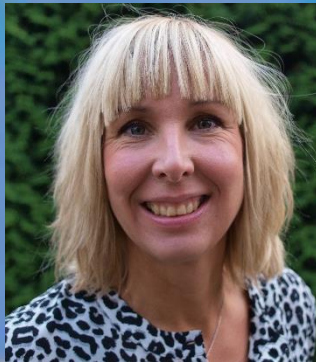

**Karin Lager**  
(ECERS)

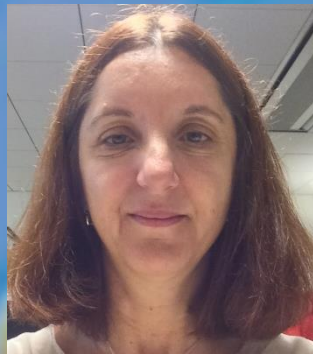

**Panagiota Nasiopoulou**  
(ECERS)

**Martin Boson**  
(DIL)

**Lotta Ring**  
(DIL)
