# Supplementary material
Source: publisher figshare collection journal article supplement (https://tandf.figshare.com/articles/dataset/_/7149173)
Supplement: Supplementary file 5 [file 2]

Archive with 5 entries (5 files):
- 1_INFO_to_guardians_ENG.pdf
- 2_A_book_about_testing.pdf
- 3_THE_SNAKE_CALENDAR.pdf
- 3_THE_SNAKE_CALENDER_ON_THE_FLOOR.JPG
- 4_Images_of_intervention_and_tshirt.pdf
