# Supplementary material
Source: publisher figshare collection journal article supplement (https://tandf.figshare.com/articles/dataset/_/7149173)

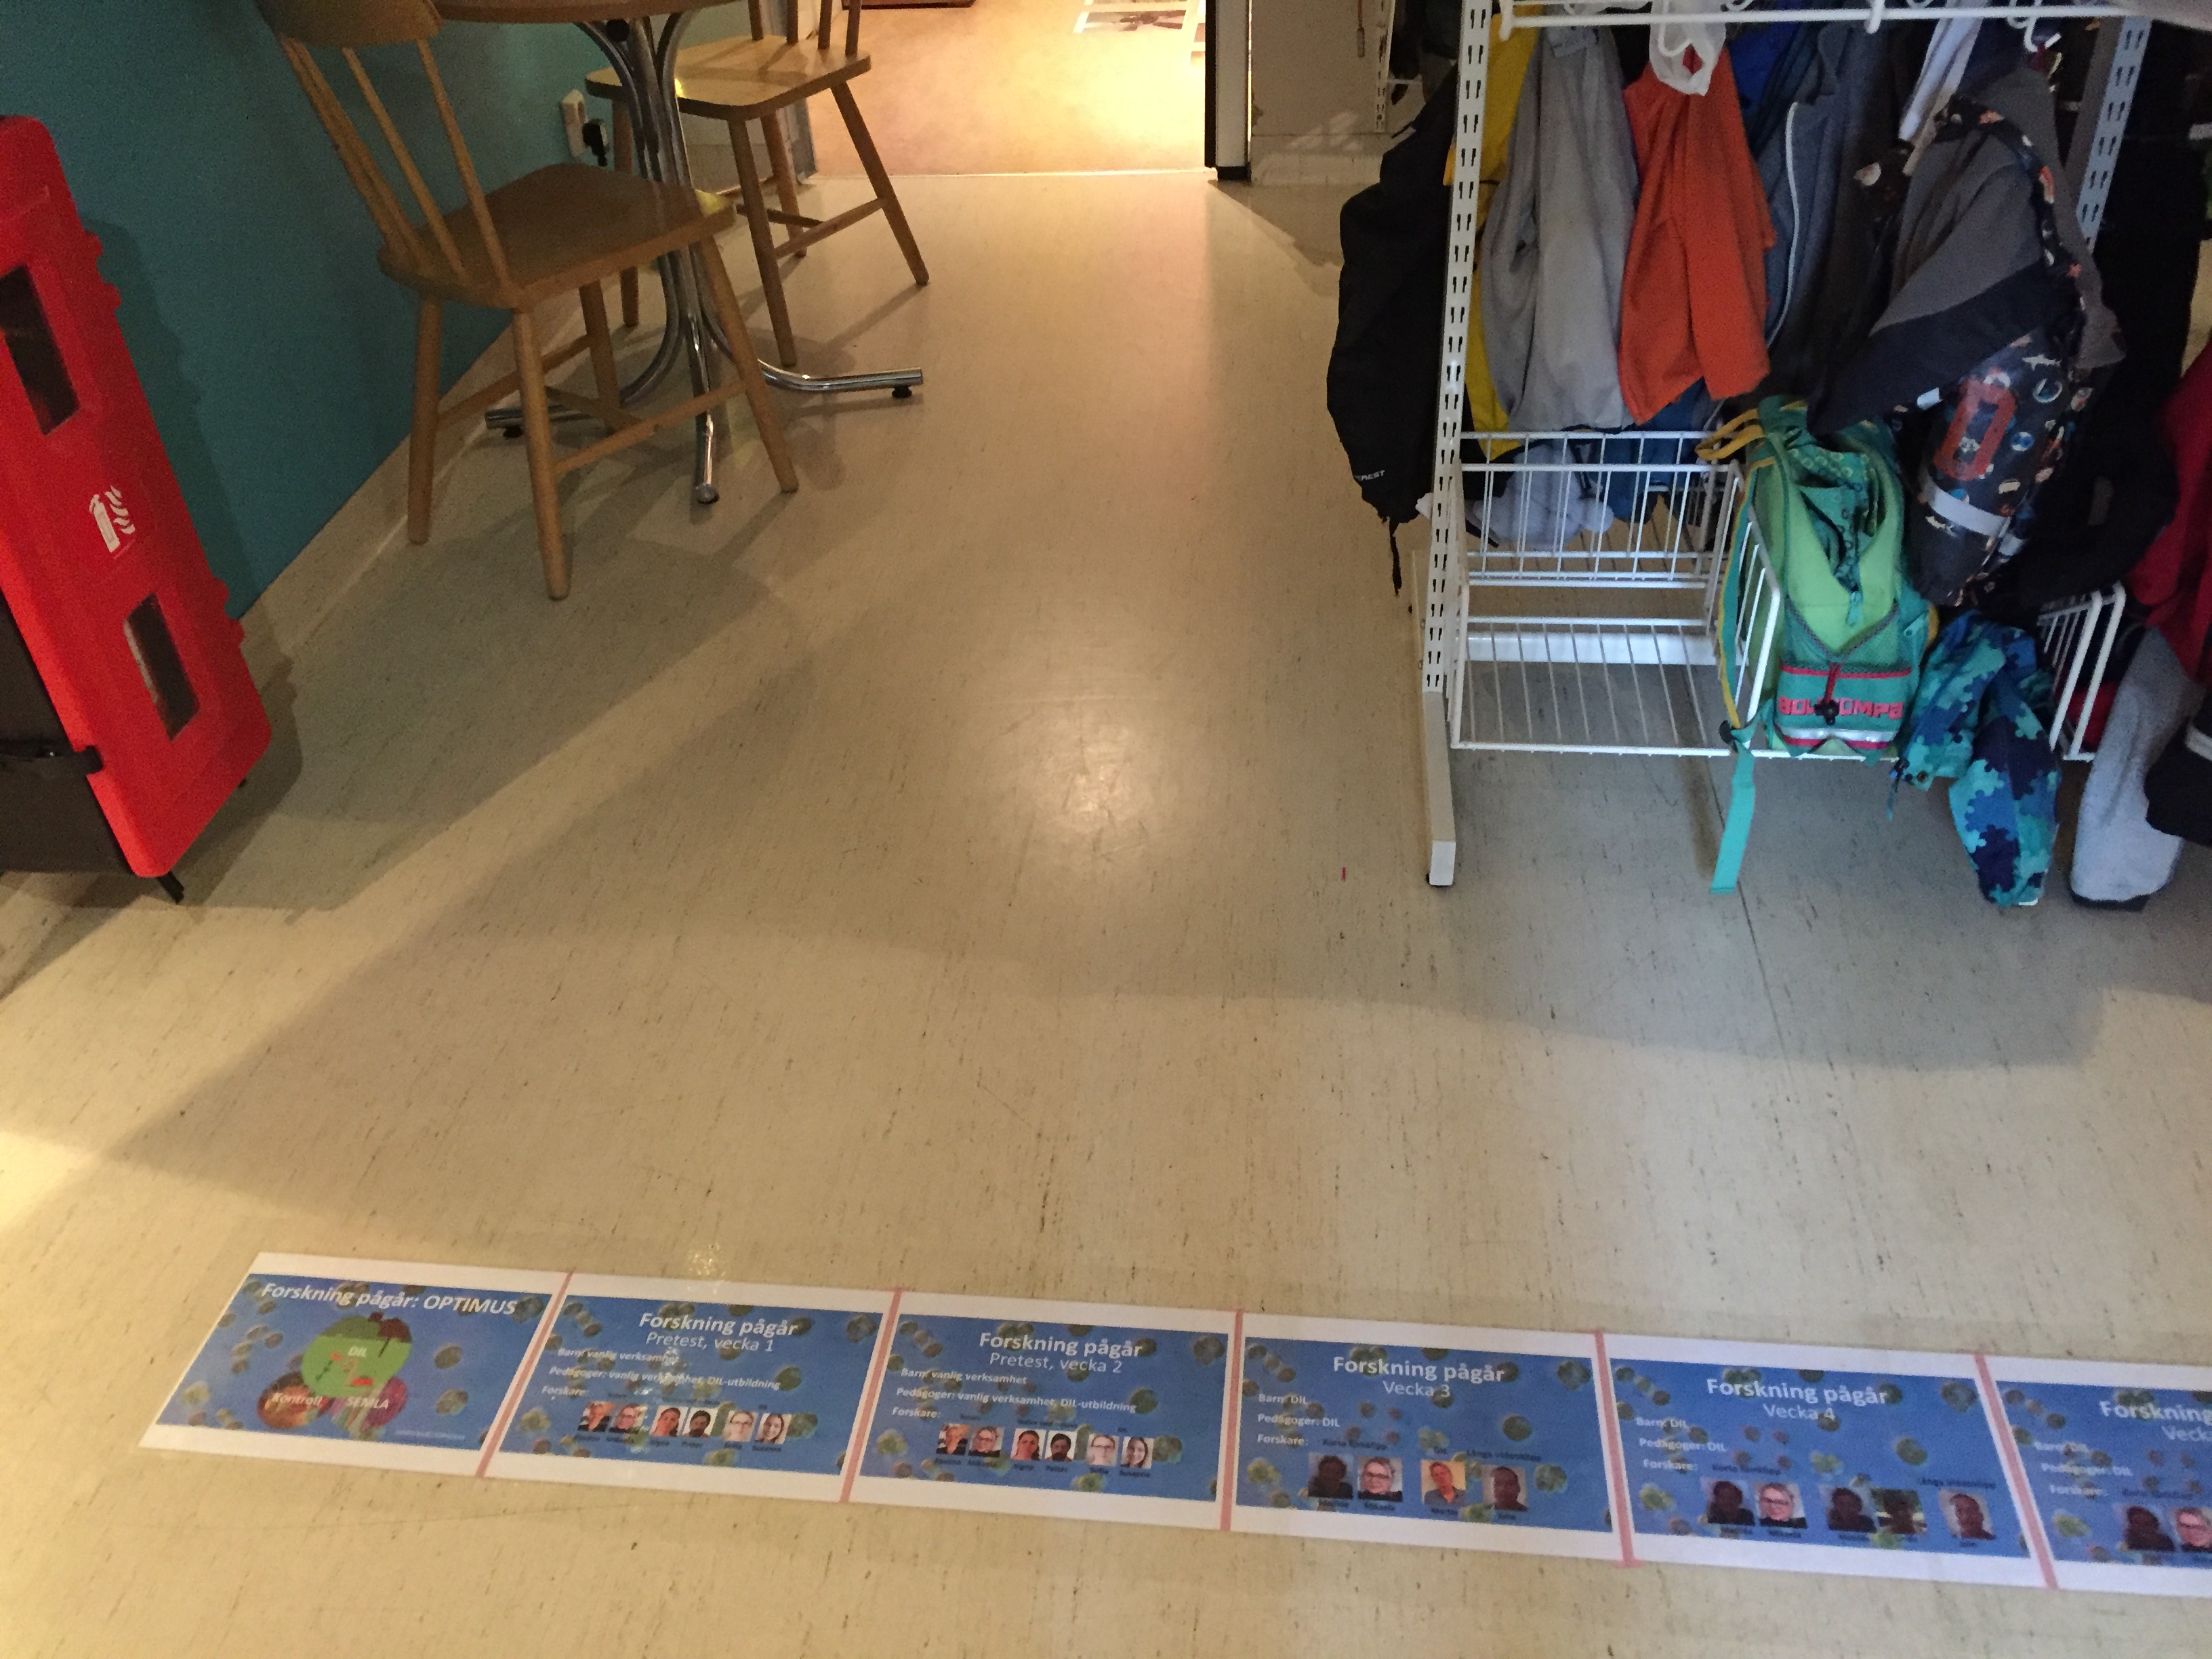

Supplement: Supplementary file 5 [file 2 › 3_THE_SNAKE_CALENDER_ON_THE_FLOOR.JPG]
